# Supplementary material for: Support effects on conical intersections of Jahn–Teller fluxional metal clusters on the sub-nanoscale
Source: Royal Society of Chemistry journal article supplement (doi:10.1039/d4cp03271c), 2024-01-01
Supplement: d4cp03271c1.pdf [file d4cp03271c1.pdf]

Cite this: DOI: 00.0000/xxxxxxxxxx

## Electronic Supplementary Information: Support effects on conical intersections of Jahn-Teller fluxional metal clusters on the sub-nanoscale.

Katarzyna M. Krupka<sup>a</sup> and María Pilar de Lara-Castells<sup>\*a</sup>

Table 1 Cartesian coordinates of Cu<sub>3</sub>–benzene complex optimized at CCSD(T) level of theory with the (A)VTZ-PP basis set (see Methods section of the main manuscript).

|    |               |               |               |
|----|---------------|---------------|---------------|
| Cu | 0.000000000   | 0.000000000   | 2.1647011780  |
| Cu | 1.1965698226  | 0.000000000   | 0.1452150968  |
| Cu | -1.1965698226 | 0.000000000   | 0.1452150968  |
| C  | 1.4393562644  | 0.000000000   | -1.8668074845 |
| C  | 0.6891623209  | 1.2327787744  | -2.0438192718 |
| C  | -0.6891623209 | 1.2327787744  | -2.0438192718 |
| C  | -1.4393562644 | 0.000000000   | -1.8668074845 |
| C  | -0.6891623209 | -1.2327787744 | -2.0438192718 |
| C  | 0.6891623209  | -1.2327787744 | -2.0438192718 |
| H  | 2.4930222766  | 0.000000000   | -2.1266921421 |
| H  | 1.2275673417  | 2.1667866008  | -2.1551182346 |
| H  | -1.2275673417 | 2.1667866008  | -2.1551182346 |
| H  | -2.4930222766 | 0.000000000   | -2.1266921421 |
| H  | -1.2275673417 | -2.1667866008 | -2.1551182346 |
| H  | 1.2275673417  | -2.1667866008 | -2.1551182346 |

Table 2 Cartesian coordinates of benzene optimized at CCSD(T) level of theory with the VTZ-PP basis set (see Methods section of the main manuscript).

|   |               |               |               |
|---|---------------|---------------|---------------|
| C | 0.000000000   | 1.3975343043  | 0.0000107037  |
| C | -1.2103050738 | 0.6987689685  | -0.0000037014 |
| C | -1.2103050738 | -0.6987689685 | -0.0000037014 |
| C | 0.000000000   | -1.3975343043 | 0.0000107037  |
| C | 1.2103050738  | -0.6987689685 | -0.0000037014 |
| C | 1.2103050738  | 0.6987689685  | -0.0000037014 |
| H | 0.000000000   | 2.4806619448  | -0.0000269835 |
| H | -2.1483156187 | 1.2403389412  | -0.0000061758 |
| H | -2.1483156187 | -1.2403389412 | -0.0000061758 |
| H | 0.000000000   | -2.4806619448 | -0.0000269835 |
| H | 2.1483156187  | -1.2403389412 | -0.0000061758 |
| H | 2.1483156187  | 1.2403389412  | -0.0000061758 |

Python code delivering a two-dimensional representation of relaxed potential energy surface scans of Cu<sub>3</sub>–benzene in two crossing electronic states is available in the plot.txt (plot.py) file. Data containing  $\theta$  angles (in degrees), Z distances (in Å) and relative energies (in eV) for both states are available in the data.txt and theta60.txt files.

Table 3 Numerical values of Cu<sub>3</sub>–benzene uncoupled dispersion ( $E_{\text{disp}}^{\text{UHF}}$ ), coupled dispersion ( $E_{\text{disp}}^{\text{TD-UHF}}$ ) contributions, difference between them ( $\Delta E_{\text{disp}}^{\text{UHF}}$ ) (in cm<sup>-1</sup>) and values of the square of the coefficient of the main configuration in the reference wavefunction ( $CI^2$ ) for the orthogonal and parallel configurations.

|            | $E_{\text{disp}}^{\text{UHF}}$ | $E_{\text{disp}}^{\text{TD-UHF}}$ | $\Delta E_{\text{disp}}$ | $CI^2$ |
|------------|--------------------------------|-----------------------------------|--------------------------|--------|
| orthogonal | -27269                         | -23842                            | 3427                     | 0.8822 |
| parallel   | -8503                          | -7174                             | 1329                     | 0.8977 |

<sup>a</sup> Institute of Fundamental Physics (AbinitSim Unit, ABINITFOT Group), Madrid, Spain.  
E-mail: Pilar.deLara.Castells@csic.es
